1

2

3

4 Efficacy and safety of ethanolamine oleate in sclerotherapy in patients with

5 difficult-to-resect venous malformations: A multicenter, open-label,

6 single-arm study

7 Running head: Ethanolamine oleate sclerotherapy in difficult-to-resect venous

8 malformations

9

10

11 Mine Ozaki<sup>1\*</sup>, Tadashi Nomura<sup>2</sup>, Keigo Osuga<sup>3</sup>, Masakazu Kurita<sup>4</sup>, Ayato Hayashi<sup>5,6</sup>,

12 Shunsuke Yuzuriha<sup>7</sup>, Noriko Aramaki-Hattori<sup>8</sup>, Makoto Hikosaka<sup>9</sup>, Taiki Nozaki<sup>10</sup>,

13 Michio Ozeki<sup>11</sup>, Junko Ochi<sup>12</sup>, Shimpei Akiyama<sup>13</sup>, Yasumasa Kakei<sup>14,15</sup>, Keiko

14 Miyakoda<sup>15</sup>, Naoko Kashiwagi<sup>15</sup>, Takahiro Yasuda<sup>15,16</sup>, Yuki Iwashina<sup>1</sup>, Tsuyoshi

15 Kaneko<sup>9</sup>, Kiyoko Kamibepu<sup>17</sup>, Takafumi Soejima<sup>18</sup>, Kiyonori Harii<sup>1</sup>

16

17 <sup>1</sup> Department of Plastic Surgery, Kyorin University Faculty of Medicine, Tokyo, Japan

18 <sup>2</sup> Department of Plastic Surgery, Kobe University Graduate School of Medicine, Hyogo,

19 Japan

20 <sup>3</sup> Department of Diagnostic Radiology, Osaka Medical and Pharmaceutical University,

21 Osaka, Japan

22 <sup>4</sup> Department of Plastic and Reconstructive Surgery, The University of Tokyo Hospital,

23 Tokyo, Japan

24 <sup>5</sup> Department of Plastic and Reconstructive Surgery, Yokohama City University,

25 Kanagawa, Japan

26 <sup>6</sup> Department of Plastic and Reconstructive Surgery, Juntendo University School of

27 Medicine, Tokyo, Japan

28 <sup>7</sup> Department of Plastic and Reconstructive Surgery, Shinshu University School of

29 Medicine, Nagano, Japan

30 <sup>8</sup> Department of Plastic and Reconstructive Surgery, Keio University School of Medicine,

31 Tokyo, Japan

32 <sup>9</sup> Department of Plastic and Reconstructive Surgery, National Center for Child Health and

33 Development, Tokyo, Japan

34 <sup>10</sup> Department of Radiology, Keio University School of Medicine, Tokyo, Japan

35 <sup>11</sup> Department of Pediatrics, Graduate School of Medicine, Gifu University, Gifu, Japan

36 <sup>12</sup> Department of Diagnostic Radiology, Suita Tokushukai Hospital, Osaka, Japan

37 <sup>13</sup> Department of Radiology, Kyoto Prefectural University of Medicine, Kyoto, Japan

38 <sup>14</sup> Department of Oral and Maxillofacial Surgery, Kobe University Graduate School of

39 Medicine, Hyogo, Japan

40 <sup>15</sup> Department of Medical Devices, Kobe University Graduate School of Medicine,

41 Hyogo, Japan

42 <sup>16</sup> Advanced Medical-Engineering Development Center, Kobe University, Hyogo, Japan

43 <sup>17</sup> Division of Health Sciences and Nursing, Graduate School of Medicine, the

44 University of Tokyo, Tokyo, Japan

45 <sup>18</sup> Department of Child Health Nursing, Kobe University Graduate School of Health

46 Sciences, Hyogo, Japan

47

48 \* Corresponding author:

49 E-mail: [zakimin@nifty.com](mailto:zakimin@nifty.com) (MO)

50

51 **Abstract**

52 **Objective**

53 To evaluate the efficacy and safety of sclerotherapy in patients with difficult-to-resect  
54 venous malformations treated with ethanolamine oleate.

55 **Design and setting**

56 This investigator-initiated clinical trial employed a multicenter, single-arm, open-label  
57 design and was conducted in Japan.

58 **Patients**

59 Overall, 44 patients with difficult-to-resect venous malformations were categorized into  
60 two cohorts: 22 patients with cystic-type malformations and 22 patients with diffuse-type  
61 malformations.

62 **Interventions**

63 Patients received injections of 5% ethanolamine oleate solution, double diluted with  
64 contrast or normal saline, with a maximum dose of 0.4 mL/kg. The same method of  
65 administration was used for children (<15 years old). The maximum volume of the  
66 prepared solution in one treatment was 30 mL.

67 **Evaluation methods**

68 Treatment efficacy was assessed by evaluating changes in lesion volume using magnetic  
69 resonance imaging and changes in pain using a visual analog scale.

## 70 **Results**

71 Among the 45 patients who consented, one was excluded owing to potential intracranial  
72 involvement of venous malformations during screening. Regarding the primary outcome,  
73 26 of 44 patients (59.1%, 95% confidence interval: 44.41–72.31%) achieved  $\geq 20\%$   
74 reduction in malformation volume, with 16 patients having cystic lesions (72.7%,  
75 51.85–86.85%) and 10 patients having diffuse lesions (45.5%, 26.92–65.34%). Both  
76 cohorts showed significant improvement in self-reported pain scores associated with  
77 lesions 3 months post-sclerotherapy. No death or serious adverse events occurred.  
78 Hemoglobinuria was observed in 23 patients (52%), a known drug-related adverse event.  
79 Prompt initiation of haptoglobin therapy led to full recovery within a month for these  
80 patients.

## 81 **Conclusions**

82 Ethanolamine oleate shows potential as a therapeutic sclerosing agent for patients with  
83 difficult-to-resect venous malformations.

84

85 **Keywords:** sclerotherapy, ethanolamine oleate, venous malformation, cavernous

86 hemangioma, hemoglobinuria

87

## 88 **Introduction**

89           Venous malformations (VMs) are vascular developmental abnormalities that  
90 arise during fetal life and are associated with pain, movement disorders, and other  
91 symptoms [1-3]. A study conducted by the Ministry of Health, Labor and Welfare in  
92 Japan (Project on Intractable Hemangioma, Vascular Malformation, Lymphangioma,  
93 Lymphangiomatosis and Related Diseases in Fiscal 2014) estimated that 20,000  
94 individuals are affected by VMs, with half of them harboring difficult-to-resect lesions  
95 due to extensive involvement or muscle infiltration [4,5]. For such cases, sclerotherapy is  
96 the treatment of choice [2,6-9].

97           Sclerotherapy is a globally recognized treatment for VMs, described as among  
98 the most effective options available. Ethanolamine oleate, a sclerosing agent, has been  
99 extensively documented in this regard [10]. American guidelines for percutaneous  
100 sclerotherapy for head and neck venous and lymphatic malformations [11] and European  
101 guidelines for sclerotherapy in chronic venous disorders both acknowledge the  
102 effectiveness of sclerotherapy in chronic venous disorders, including VMs [12]. However,  
103 to the best of our knowledge, sclerotherapy for VMs remains uncovered by health  
104 insurance policies, with no pharmaceutical approval for any sclerosing agent across  
105 countries to date.

106           In Japan, ethanolamine oleate, absolute ethanol, and polidocanol have been used  
107 as off-label sclerosing agents for VM treatment [13-17]. While absolute ethanol and  
108 polidocanol are associated with serious, life-threatening adverse events [11,18,19],  
109 ethanolamine oleate is considered a safer option with minimal adverse events [20].  
110 Horbach et al.'s article [20], which analyzed five studies encompassing 188 patients  
111 treated with ethanolamine oleate for venous or lymphatic malformations, reported skin

112 ulceration and skin necrosis (six cases, 3%) as adverse events. However, systemic  
113 adverse events, facial nerve disorders, or other adverse events were absent [20]. In  
114 another study that evaluated the cytotoxicity of each sclerosing agent in muscle tissue,  
115 absolute ethanol was the most cytotoxic, with ethanolamine oleate and polidocanol  
116 exhibiting comparably lower cytotoxicity [14]. Conversely, efficacy studies have shown  
117 promising results for ethanolamine oleate, which reduced lesions and improved  
118 symptoms in 88–100% of cases evaluated in a systematic review [20]. Furthermore, a  
119 pediatric-centered study examined its application in children (mean age: 15.1 years,  
120 range: 3 months to 21 years) among 83 patients (comprising 85 procedures), resulting in  
121 complete symptom resolution for 79 lesions and notable enhancements for six lesions  
122 [21]. Although ethanolamine oleate is currently approved as a sclerosing agent for  
123 esophageal and gastric varices in Japan [22,23], its use has not been indicated for  
124 pediatric patients. This is particularly relevant considering the congenital nature of VMs,  
125 often requiring treatment in children. Nevertheless, existing evidence suggests its  
126 efficacy in pediatric patients.

127           Given its efficacy and safety profile, ethanolamine oleate is regarded as the most  
128 appropriate candidate for initial regulatory approval as a sclerosing agent for VMs. A  
129 limited number of well-designed clinical trials have investigated treatment options for  
130 difficult-to-resect VMs; we initiated a phase III, multicenter, open-label, single-arm  
131 clinical trial to aid the Japanese government in approving health insurance coverage.  
132 Based on their morphological characteristics, VMs can be broadly categorized into cystic  
133 and diffuse lesions. Cystic lesions are more likely to shrink with sclerotherapy, whereas  
134 diffuse lesions are less likely to respond [24]. Consequently, the study design employed  
135 volume reduction and pain improvement as the evaluation criteria for cystic and diffuse



136 lesions, respectively. This clinical trial aimed to characterize the clinical impact of

137 ethanolamine oleate injection in patients with difficult-to-resect VMs.

138

## 139 **Materials and methods**

### 140 **Study design and procedure**

141 This non-randomized, prospective, open-label, multicenter clinical trial was  
142 conducted at eight hospitals from January 1, 2021 to the end of April 2023 (the last  
143 patient's visit). The recruitment period for Kyorin University Hospital, Kobe University  
144 Hospital, Osaka Medical and Pharmaceutical University Hospital, The University of  
145 Tokyo Hospital, Juntendo University Urayasu Hospital, and National Center for Child  
146 Health and Development Hospital was from 1/1/2021 to 31/3/2023; for Shinshu  
147 University Hospital, the recruitment period was from 1/2/2021 to 31/3/2023; for Keio  
148 University Hospital, the recruitment period was from 19/3/2021 to the 31/3/2023. A  
149 summary of this study is presented in Fig 1. The observation period continued for 3  
150 months following the intervention. Participants were instructed to visit at designated  
151 times during the observation period and provided with reimbursement for travel expenses  
152 to reduce the burden on patients. Written informed consent was obtained from all patients  
153 or their parents/guardians if the patient was under 20 years old. This clinical trial was  
154 approved by the Institutional Review Board of each facility (Kyorin University Hospital,

155 Kobe University Hospital, Osaka Medical and Pharmaceutical University Hospital,  
156 Shinshu University Hospital, The University of Tokyo Hospital, Juntendo University  
157 Urayasu Hospital, Keio University Hospital, National Center for Child Health and  
158 Development Hospital). The study protocol adhered to the SPIRIT statement. All data  
159 were stored and archived at the Data Center of DOT World Co., Ltd., Tokyo, Japan.

160

161 **Fig 1. Summary of the study protocol.** MRI, magnetic resonance imaging; CT,  
162 computed tomography

163

## 164 **Sample size calculation**

165         Considering cystic lesions, the threshold for volume reduction was set at a  
166 minimum of 20%. This was based on the assumption that successful treatment should  
167 improve the conditions of a proportion of patients, achieving either complete response  
168 (target lesion resolved) or partial response ( $\geq 20\%$  target lesion volume reduction).  
169 Limited data exist regarding magnetic resonance imaging (MRI)-based evaluations for  
170 ethanolamine oleate in difficult-to-resect VMs. Kaji et al. [7] reported a median  
171 MRI-based lesion reduction rate of approximately 25% in 60 participants with VMs.  
172 Because the median corresponds to the 50th percentile of the data distribution, more than  
173 50% of patients are expected to experience a reduction rate  $\geq 20\%$ , as shown in the figure  
174 presented by Kaji et al. A study conducted by Alexander et al. [25] reported on  
175 MRI-based reduction rates for VMs and demonstrated that at least 50% of participants  
176 achieved a reduction rate  $\geq 20\%$  [25].

177           It should be noted that Kaji et al. [7] calculated the lesion reduction rate from the  
178 measured area of the lesion. Although Kaji’s method differs from that used in the current  
179 study, we considered the reduction rate reported in these previous studies to be suitable  
180 since the expected threshold and complete response and partial response values in the  
181 present study would be at least 50% [25].

182           It was estimated that the present trial required the inclusion of 19 cases per group  
183 to obtain 80% statistical power to detect significant between-group differences based on a  
184 binomial distribution with a one-sided 2.5% significance level. Considering potential  
185 dropout cases, the target number of patients with cystic lesions was set to 22. The same  
186 target was used for cases with diffuse lesions, and a total of 44 cases were targeted for  
187 recruitment.

188

## 189 **Participant inclusion criteria**

190           Participants were selected according to the inclusion criteria set by investigators  
191 collecting patient information during outpatient consultations at each facility among the  
192 patients with VMs introduced at each facility. The inclusion criteria were any age;  
193 informed consent, either directly or through their legal guardians if under 20 years old;  
194 and VMs considered challenging to surgically remove, with sclerotherapy identified as  
195 the primary treatment option. Difficulty in resection was defined by the investigator or  
196 sub-investigator as a high risk of lifestyle dysfunction due to potential complications  
197 from excision or the risk of aesthetic impairment.

198           Moreover, patients needed to exhibit at least one target VM with a major axis  
199 diameter  $\geq 30$  mm in the extremities or  $\geq 20$  mm in the head and neck, as determined on  
200 MRI or computed tomography. Additionally, inclusion criteria stipulated the absence of a

201 thrombus or organized tissue that could interfere with the evaluation of images or the  
202 judgment of treatment effectiveness in target VMs.

203

## 204 **Participant exclusion criteria**

205 The exclusion criteria included multiple organ failure or disseminated  
206 intravascular coagulation; currently taking or recently started taking medications known  
207 to influence lesion resolution, such as propranolol or specific herbal medicines like  
208 Kamishoyosan or Ninjinyoeito; diabetes mellitus (HbA1c  $\geq 8.0$ ) or autoimmune  
209 disorders; Child–Pugh Class C liver dysfunction; renal dysfunction (estimated  
210 Glomerular Filtration Rate  $< 60$  mL/min/1.73 m<sup>2</sup>); or cardiac dysfunction (New York  
211 Heart Association Class  $\geq 2$ ).

212 Further exclusions encompassed patients who had undergone sclerotherapy  
213 within 6 months preceding signing of the informed consent, with a history of allergy to  
214 ethanolamine oleate or angiography contrast agents, and those who had undergone  
215 surgery exceeding 45 min within 2 weeks preceding signing of the informed consent.  
216 Additionally, participation in other clinical studies within 4 weeks preceding signing of  
217 the informed consent, pregnancy, potential pregnancy, or lactation rendered individuals  
218 ineligible. Lastly, patients deemed ineligible by the investigator or sub-investigator were  
219 not enrolled.

220

## 221 **Intervention**

222 The following procedures were performed by the investigator from each facility  
223 under general anesthesia in the operating room. Patients received injections of 5%  
224 ethanolamine oleate solution, double diluted with contrast or normal saline (Fig 2), with a

225 maximum dose of 0.4 mL/kg. The same method of administration was used for children  
226 (<15 years old). The maximum volume of the prepared drug in one treatment was 30 mL.  
227 The safety of this dose is within the range approved for gastric variceal treatment in Japan  
228 [22], and its efficacy has been reported in previous studies [7,13,15-17]. The drug is  
229 administered only once; however, for patients with diffuse lesions, if there is little  
230 improvement in symptoms such as pain even after 4 weeks from administration, and the  
231 principal investigator deems it necessary for treatment, additional dosing is permitted. In  
232 such cases, the dosage should be the same as the initial dose.

233

234 **Fig 2. Sclerotherapy procedure for venous malformations.** (A) Adjust the position of  
235 the fluoroscopy device. (B) Insert a needle under ultrasound guidance. (C) Ultrasound  
236 image at the time (B-mode). The inserted needle is visible (arrow). (D) Apply negative  
237 pressure to confirm the presence of back flow (arrow). (E) During digital subtraction  
238 angiography, contrast is injected to confirm the location of the lesion and outflow  
239 pathways. Once it is confirmed that the needle is in the appropriate position and the  
240 injection volume is verified, inject the sclerosing agent diluted with contrast. (F)  
241 Fluoroscopy after multiple iterations of this process showing the persistence of the  
242 sclerosing agent within the lesion due to the contrast mixture. (G) Ultrasound imaging  
243 confirming the presence of a sclerosing agent under ultrasound guidance.

244

## 245 **Endpoints**

246 The primary endpoint was achieving a  $\geq 20\%$  VM volume reduction 3 months  
247 post-intervention. This endpoint was chosen based on the assumption that a positive  
248 correlation between VM symptoms and lesion volume translates to clinical efficacy [26].

249 MRI scans were outsourced to an external institution for lesion volume analysis.  
250 Afterwards, the images were separately evaluated by two independent board-certified  
251 radiologists using the image analysis software OsiriX (PixMeo SARL, Geneva,  
252 Switzerland) (Fig 3). The final value was determined by averaging the measurements  
253 obtained by each evaluator. The interobserver correlation coefficient (2,1) was calculated  
254 to assess the reproducibility of the measurements between the evaluators.

255 The key secondary endpoint was improvement in symptoms, particularly  
256 self-reported, lesion-associated pain scores, 3 months post-intervention. Patients aged 2  
257 to 5 years were evaluated using the face scale (range: 1–6), developed by Wong-Baker  
258 [27], whereas those aged  $\geq 6$  years were evaluated using a visual analog scale (VAS)  
259 (range: 0–100). Two-time scales were assessed using the VAS: maximum pain within 24  
260 h and maximum pain within 1 week.

261 Adverse events and adverse drug reactions were documented to evaluate safety  
262 endpoints. The severity of adverse events was determined based on the following criteria:  
263 grade 1 denoted mild signs or symptoms that were easily tolerable, grade 2 denoted  
264 moderate signs or symptoms that interfered with daily activities, and grade 3 denoted  
265 severe signs or symptoms that significantly impacted daily life.

266

267 **Fig 3. A woman in her thirties with a painful intramuscular VM in the right thigh.**

268 (A,B) Magnetic resonance imaging (MRI) before sclerotherapy (T2-weighted images:  
269 axial and coronal views). (C) One slide of the image subjected to segmentation using  
270 OsiriX (image analysis software) on MRI before sclerotherapy. (D) Digital subtraction  
271 angiography during sclerotherapy showing the administration of the sclerosing agent  
272 diluted with contrast. (E,F) MRI 3 months after sclerotherapy (T2-weighted images: axial

273 and coronal views), confirming lesion volume reduction. The patient reported the  
274 resolution of pain at this time.

275

## 276 **Statistical analysis of endpoints**

277 The full analysis set comprised all patients who underwent the study intervention,  
278 ensuring a comprehensive evaluation of treatment outcomes. In contrast, the per-protocol  
279 set excluded patients deemed ineligible post-enrollment and those exhibiting severe  
280 protocol violations. This approach aimed to uphold the integrity of the analysis by  
281 focusing on patients who adhered closely to the study protocol. The safety analysis set  
282 was identical to the full analysis set.

283 Primary analyses compared the number of patients who achieved  $\geq 20\%$  VM  
284 volume reduction 3 months after sclerotherapy relative to the baseline value using a  
285 one-sided binomial test with a significance level of  $p < 0.025$  (one-sided). The 95%  
286 confidence intervals (CIs) for the proportion of patients achieving this reduction were  
287 estimated using the scoring method. This analysis was performed separately according to  
288 VM type.

289 Secondary analyses evaluated lesion-associated pain scores 3 months after  
290 sclerotherapy by estimating the median change from that at baseline with corresponding  
291 95% CIs. The Wilcoxon signed-rank test was conducted to test the null hypothesis: “The  
292 median change from baseline to 3 months after sclerotherapy in the population was  
293 greater than 0.” The significance level was set at  $p < 0.025$  (one-sided). This analysis was  
294 performed separately according to VM type and patient age ( $<6$  years and  $\geq 6$  years old).  
295 The occurrence of adverse events was assessed for safety evaluation.

296 All descriptive statistical analyses were performed using the SAS statistical  
297 software (version 9.4; SAS Institute, NC).

298

## 299 **Results**

### 300 **Participant selection, baseline demographics, and clinical** 301 **characteristics**

302 Fig 1 illustrates the participant selection flowchart. Of the 45 patients who  
303 provided informed consent, one was excluded owing to potential intracranial VM traffic  
304 during screening. The remaining 44 patients fulfilled the inclusion criteria. All patients  
305 were evaluated for the primary endpoint, and none of them discontinued treatment. Table  
306 1 summarizes the baseline demographic and clinical characteristics of the patients. It is  
307 noteworthy that for both cohorts, the full analysis set, per-protocol set, and safety analysis  
308 set encompassed the same population under analysis for this study. This ensured  
309 consistency and comparability across the various analyses conducted throughout the  
310 research.

311

312 **Table 1. Baseline Demographics and Clinical Characteristics of the Included**  
313 **Patients.**

|                   |      | <b>Cystic Type</b> | <b>Diffuse Type</b> | <b>All</b>    |
|-------------------|------|--------------------|---------------------|---------------|
|                   |      | <b>n = 22</b>      | <b>n = 22</b>       | <b>n = 44</b> |
| <b>Age (year)</b> | Mean | 22.5               | 23.3                | 22.9          |
|                   | SD   | 18.8               | 16.9                | 17.6          |
|                   | Min  | 3                  | 5                   | 3             |



|                                                             |                   |           |           |           |
|-------------------------------------------------------------|-------------------|-----------|-----------|-----------|
|                                                             | Median            | 16.5      | 16.5      | 16.5      |
|                                                             | Max               | 78        | 59        | 78        |
| <b>Sex (%)</b>                                              | Male              | 13 (59.1) | 9 (40.9)  | 22 (50.0) |
|                                                             | Female            | 9 (40.9)  | 13 (59.1) | 22 (50.0) |
| <b>Body weight (kg)</b>                                     | Mean              | 45.73     | 49.02     | 47.37     |
|                                                             | SD                | 24.32     | 15.60     | 20.26     |
|                                                             | Min               | 14.7      | 20.3      | 14.7      |
|                                                             | Median            | 49.1      | 50.5      | 49.1      |
|                                                             | Max               | 92.0      | 75.2      | 92.0      |
| <b>Location of venous malformations (%)</b>                 | Trunk             | 5 (22.7)  | 4 (18.2)  | 9 (20.5)  |
|                                                             | Upper limb        | 3 (13.6)  | 8 (36.4)  | 11 (25.0) |
|                                                             | Lower limb        | 5 (22.7)  | 10 (45.5) | 15 (34.1) |
|                                                             | Face              | 5 (22.7)  | 0 (0.0)   | 5 (11.4)  |
|                                                             | Oral              | 1 (4.5)   | 0 (0.0)   | 1 (2.3)   |
|                                                             | Neck              | 3 (13.6)  | 0 (0.0)   | 3 (6.8)   |
|                                                             |                   |           |           |           |
| <b>Previous treatment for venous malformations (%)</b>      | Yes               | 10 (45.5) | 12 (54.5) | 22 (50.0) |
|                                                             | No                | 12 (54.5) | 10 (45.5) | 22 (50.0) |
| <b>Treatment history of sclerotherapy for target lesion</b> | Initial treatment | 17 (77.3) | 13 (59.1) | 30 (68.2) |

|     |                 |          |          |           |
|-----|-----------------|----------|----------|-----------|
| (%) |                 |          |          |           |
|     | Retreatme<br>nt | 5 (22.7) | 9 (40.9) | 14 (31.8) |

314 Max, maximum; min, minimum; n, number; SD, standard deviation.

315

### 316 **Primary endpoint**

317 All 44 patients underwent sclerotherapy, and none of the patients with diffuse  
 318 VMs required additional treatment. Overall, a total of 26 patients (59.1%) achieved a VM  
 319 volume reduction  $\geq 20\%$ , including 16 patients with cystic lesions (72.7%, 95% CI:  
 320 51.85–86.85%) and 10 patients with diffuse lesions (45.5%, 26.92–65.34%). For both  
 321 cohorts, the percentage of patients achieving a reduction rate  $\geq 20\%$  was statistically  
 322 significant compared with the pre-specified criterion of 20% (cystic lesions:  $p < 0.001$ ,  
 323 diffuse lesions:  $p = 0.001$ ). Data of patients who achieved a reduction rate  $\geq 20\%$  are  
 324 shown in Table 2, and the percentage change in lesion volume for each patient is shown in  
 325 Fig 4. The interobserver correlation coefficient (2,1) for the MRI analysis was 0.999 ( $n =$   
 326 88, 99.8–100%).

327

328 **Fig 4. Waterfall plot of the evaluated lesion volume.** (A) Diagrams of cystic lesions  
 329 and diffuse lesions. (B) Diagrams for all cases.

330

331 **Table 2. Patients Who Achieved  $\geq 20\%$  Venous Malformation Volume Reduction 3**  
 332 **Months After the Intervention.**

| Venous | No. of | Achieving a Reduction of at Least 20% | P |
|--------|--------|---------------------------------------|---|
|--------|--------|---------------------------------------|---|

| <b>Malformations</b> | <b>Patients</b> | <b>No. of Achievers</b> | <b>Percentage</b> | <b>95% Confidence Intervals</b> | <b>P Value</b> |
|----------------------|-----------------|-------------------------|-------------------|---------------------------------|----------------|
| <b>Cystic type</b>   | 22              | 16                      | 72.7              | 51.85–86.85                     | <0.001         |
| <b>Diffuse type</b>  | 22              | 10                      | 45.5              | 26.92–65.34                     | 0.001          |
| <b>All</b>           | 44              | 26                      | 59.1              | 44.41–72.31                     | —              |

333 The null hypothesis of this test: “The proportion of patients achieving  $\geq 20\%$  venous

334 malformation volume reduction 3 months after sclerotherapy is  $< 20\%$ .”

335 The significance level of the test was 0.025 (on one side).

336 Test method: Test based on a binomial distribution.

337 Calculation method for confidence intervals: based on the score test.

338

### 339 **Secondary endpoint**

340 The key secondary endpoint was the change in self-reported, lesion-associated  
341 pain scores from baseline to 3 months after sclerotherapy using the VAS or face scale.

342 Significant improvements in VAS scores were observed for both cohorts (cystic lesions

343 vs. diffuse lesions; 24-h maximum pain:  $n = 18$ , median:  $-2.0$ ,  $p = 0.014$  vs.  $n = 21$ ,

344 median:  $-7.0$ ,  $p = 0.013$ ; 1-week maximum pain:  $n = 13$ , median:  $-2.0$ ,  $p = 0.010$  vs.  $n$

345  $= 20$ , median:  $-28.5$ ,  $p < 0.001$ ). Due to the limited sample size of patients aged  $\leq 5$

346 years, some statistical estimations and tests using the face scale-derived data could not

347 be conducted. Changes in pain scores are presented in Table 3.

348

349 **Table. 3 Changes in Self-Reported, Lesion-Associated Pain Scores 3 Months After**

350 **Sclerotherapy.**

| <b>Venous Malformations</b> | <b>Scale</b>       | <b>Age</b> | <b>Type of Pain</b>     | <b>No. of Patients</b> | <b>Median Change From Baseline</b> | <b>95% Confidence Intervals</b> | <b>P Value</b> |
|-----------------------------|--------------------|------------|-------------------------|------------------------|------------------------------------|---------------------------------|----------------|
| <b>Cystic type</b>          | VAS $\geq$ 6 years |            | Maximum pain in 24 h    | 18                     | -2.0                               | -25.00 to 0.00                  | 0.014          |
|                             |                    |            | Maximum pain for 1 week | 13                     | -2.0                               | -51.00 to 0.00                  | 0.010          |
|                             | Face scale         | 2-5 years  | Maximum pain in 24 h    | 2                      | 0.0                                | 0.00 to 0.00                    | —              |
|                             |                    |            | Maximum pain for 1 week | 2                      | -0.5                               | -1.00 to 0.00                   | 0.500          |
| <b>Diffuse type</b>         | VAS $\geq$ 6 years |            | Maximum pain in 24 h    | 21                     | -7.0                               | -31.00 to -1.00                 | 0.013          |
|                             |                    |            | Maximum pain for 1 week | 20                     | -28.5                              | -34.00 to -16.00                | <0.001         |
|                             | Face scale         | 2-5 years  | Maximum pain in 24 h    | 1                      | 0.0                                | —                               | —              |

Maximum 1 0.0 — —  
pain for 1  
week

---

351 The null hypothesis of the test: “The median change in self-reported, lesion-associated

352 pain scores from baseline to 3 months after sclerotherapy is  $\geq 0$ .”

353 The significance level of the test was 0.025 (on one side).

354 Method of testing: Wilcoxon signed-rank test.

355 Confidence intervals were calculated according to the method described by Hahn and

356 Meeker [28].

357

## 358 **Safety evaluations**

359 No cases of death or serious adverse events were reported. Adverse events of

360 particular interest, defined as skin necrosis and visual impairment (for facial lesions)

361 following administration, were not observed during the study period. Adverse events

362 were documented in 42 patients (95.5%). Among them, one patient experienced a grade 3

363 adverse event related to pain, while nine patients experienced grade 2 adverse events.

364 These grade 2 events included three cases of pain; two of hemoglobinuria; and one each

365 of swelling, increased fibrin D-dimer, increased serum creatinine phosphokinase, and

366 ulnar nerve paralysis. Additionally, 32 patients reported grade 1 adverse events. Notably,

367 hemoglobinuria occurred in 23 patients (52%), including nine with cystic lesions

368 (40.9%) and 14 with diffuse lesions (63.6%). All cases of hemoglobinuria occurred on

369 the day of drug administration, and haptoglobin therapy was initiated on the same or

370 subsequent day; all patients recovered within 1 month.

371

## 372 **Discussion**

### 373 **Strengths of this study**

374           This clinical trial is the first well-designed study to provide robust evidence  
375 regarding the efficacy and safety of ethanolamine oleate for patients with  
376 difficult-to-resect VMs. The rarity of VMs makes it challenging to conduct large-scale  
377 trials, and the lack of clinically robust evidence hinders the pharmaceutical approval of  
378 ethanolamine oleate in some countries, including Japan [11]. This high-quality study,  
379 demonstrating positive outcomes, has the potential to pave the way for regulatory  
380 approval in such regions. Patients affected by VMs face great challenges due to the rarity  
381 of their disease and inadequate national-level support; therefore, this study holds promise  
382 for the global recognition of ethanolamine oleate treatment.

383

### 384 **Interpretation of the study endpoints**

385           Regarding the primary endpoint, the majority of patients achieved  $\geq 20\%$  VM  
386 volume reduction 3 months after sclerotherapy. Specifically, 16 patients (72.7%) with  
387 cystic lesions and 10 patients (45.5%) with diffuse lesions demonstrated a volume  
388 reduction  $\geq 20\%$ . These findings suggest the utility of ethanolamine oleate administration  
389 in reducing VM volume for both cystic and diffuse lesions, consistent with previous  
390 reports [7,25]. Given that thrombus formation and lesion enlargement can induce diverse  
391 symptoms in patients with VMs, a volume reduction  $\geq 20\%$  is clinically significant. As  
392 such, patients who achieved this reduction have reported improvements in symptoms  
393 such as pain.

394           Regarding the secondary endpoint, significant improvements in self-reported,  
395 lesion-associated pain scores were observed 3 months after sclerotherapy, which aligned  
396 with the findings of previous studies [14,21,29-32]. Although the mechanism through  
397 which pain is alleviated by sclerotherapy for VM is not currently well understood, the  
398 following mechanisms are hypothesized. Upon injection into the blood vessel, the  
399 sclerosing agent damages the endothelium, causing the vessel to contract, which  
400 obstructed the blood flow. This may reduce abnormal blood flow and pressure,  
401 potentially alleviating pain. Additionally, the sclerosing agent can strengthen the vessel  
402 walls, reducing their leakage and dilation, which can also alleviate pain. Furthermore, the  
403 reduced frequency of thrombus formation decreases the likelihood of thrombophlebitis,  
404 contributing to pain reduction.

405

## 406 **Safety of this method**

407           Regarding safety, hemoglobinuria was reported in approximately 52% of the  
408 patients in our study, which was comparable to the prevalence reported in previous  
409 Japanese clinical observational studies (27.7–50.0%) [7,14,33]. In cases where  
410 hemoglobinuria occurs during sclerotherapy with ethanolamine oleate, there is a potential  
411 risk of progression to acute renal failure [34]. Therefore, clinicians should be aware of the  
412 importance of early administration of haptoglobin, a plasma fraction preparation [35]. In  
413 a study by Fujiki et al. [33], early haptoglobin administration for hemoglobinuria  
414 prevented renal damage in all cases, and these authors identified that a 5% ethanolamine  
415 oleate dose  $\geq 0.18$  mL/kg was a predictive factor for gross hematuria. To avoid acute renal  
416 failure, it is essential to disseminate information regarding the risk of hemoglobinuria  
417 with ethanolamine oleate use through guidelines or similar resources. Interestingly, no

418 cases of skin ulceration or skin necrosis were observed in the present study, whereas  
419 previous studies have reported incidence rates of 3.0–14.7% [7,21,36]. The absence of  
420 these complications implies a safer treatment profile with our regimen.

421

## 422 **Limitations of this study**

423         Some limitations were noted in the present study. First, the study employed a  
424 single-arm design and included a relatively limited sample size. Although this reflected  
425 the rarity of the studied disease, this also limits the generalizability of our findings.  
426 Nevertheless, our study population was comparable to that included in the trial that  
427 served as the basis for approval (44 patients), and our study employed a post-intervention  
428 evaluation period of 3 months. Larger scale studies with longer follow-up periods are  
429 needed to clarify our findings. Second, while no age restrictions were imposed in this  
430 study, we were unable to recruit children  $\leq 2$  years of age, which is a significant  
431 population affected by VMs. Lastly, the inclusion of some patients who lacked baseline  
432 pain assessment data and the presence of age-related variations in pain scale  
433 comprehension limited the applicability of a single pain assessment tool.

434

## 435 **Conclusion**

436         To the best of our knowledge, this is the first prospective clinical trial to expound  
437 the indications for ethanolamine oleate administration in patients with difficult-to-resect  
438 VMs in Japan. In our study population of 44 patients, ethanolamine oleate significantly  
439 reduced VM lesion volume and improved pain. Regarding safety, clinicians should be  
440 aware of the significance of early haptoglobin administration for drug-induced  
441 hemoglobinuria. Our results highlight the potential of ethanolamine oleate as a treatment



442 option for patients with difficult-to-resect VMs. Further studies with larger sample sizes  
443 and longer follow-up durations are warranted to evaluate the long-term clinical outcomes  
444 of this approach.

445

## 446 **Acknowledgments**

447 This study was supported by the Kobe Clinical and Translational Research Centre. We  
448 thank all the staff for their involvement in this clinical trial.

449

## 450 **Data sharing statement**

451 Individual participant data underlying the results (text, tables, and figures) reported in this  
452 article after de-identification will be shared following article publication. Requests will  
453 be honored by researchers who provide a methodologically sound proposal and execute a  
454 data-use agreement with Kyorin University. Requests should be directed to the  
455 corresponding author by email.

456

## 457 **Declaration of interest**

458 Fuji Chemical Industries Co., Ltd. provided ethanolamine oleate for treatment during the  
459 study period; however, the company had no role in this clinical trial. The authors declare  
460 no conflict of interest.

461

## 462 **Role of sponsor**

463 The funders had no role in study design, data collection and analysis, decision to publish,  
464 or preparation of the manuscript.

465

## 466 **Ethics**

467 This study was conducted using good clinical practice and adhered to the principles of the  
468 Declaration of Helsinki. It was approved by the ethics committee of each hospital and  
469 registered with the Japan Registry of Clinical Trials (Identifier: jRCT2051200046) under  
470 the recommendations of the International Committee of Medical Journal Editors  
471 (Registered on August 25, 2020). (<https://jrct.niph.go.jp/latest-detail/jRCT2051200046>).

472 Written informed consent was obtained from all patients or their parents/guardians. This  
473 registry is independent of for-profit interests.

474

## 475 **Contributors' statement**

476 Tadashi Nomura conceptualized, designed, managed, and conducted the clinical trial and  
477 collected the data.

478 Yasumasa Kakei conceptualized, designed, and managed the clinical trial and drafted the  
479 manuscript.

480 Keiko Miyakoda conceptualized and designed the clinical trial and was responsible for  
481 statistical analyses as a biostatistician.

482 Masakazu Kurita, Ayato Hayashi, Noriko Aramaki, Makoto Hikosaka, Shunsuke

483 Yuzuriha, Keigo Osuga, Yuki Iwashina, Taiki Nozaki, and Michio Ozeki conducted the

484 clinical trial and collected the data.

485 Mine Ozaki conceptualized, designed, managed, and conducted the clinical trial and  
486 collected the data.  
487 All authors approved the final manuscript and agreed to be accountable for all aspects of  
488 this study.  
489

## 490 **References**

- 491 1. Mulliken JB, Glowacki J. Hemangiomas and vascular malformations in infants  
492 and children: a classification based on endothelial characteristics. *Plast Reconstr*  
493 *Surg.* 1982;69: 412-422. doi: 10.1097/00006534-198203000-00002.
- 494 2. Hein KD, Mulliken JB, Kozakewich HP, Upton J, Burrows PE. Venous  
495 malformations of skeletal muscle. *Plast Reconstr Surg.* 2002;110: 1625-1635.  
496 doi: 10.1097/01.PRS.0000033021.60657.74.
- 497 3. Carabin J, Bouhamama A, Vaz G, Cuinet M, Ricoeur A, Thibaut A, et al.  
498 Percutaneous cryoablation of symptomatic intramuscular venous malformation. *J*  
499 *Vasc Interv Radiol.* 2020;31: 558-563.e3. doi: 10.1016/j.jvir.2019.10.024.
- 500 4. Kang GB, Bae YC, Nam SB, Bae SH, Sung JY. The usefulness of surgical  
501 treatment in slow-flow vascular malformation patients [published correction  
502 appears in *Arch Plast Surg.* 2017;44: 575-576]. *Arch Plast Surg.* 2017;44:  
503 301-307. doi: 10.5999/aps.2017.44.4.301.
- 504 5. Roh YN, Do YS, Park KB, Park HS, Kim YW, Lee BB, et al. The results of  
505 surgical treatment for patients with venous malformations. *Ann Vasc Surg.*  
506 2012;26: 665-673. doi: 10.1016/j.avsg.2011.12.004.
- 507 6. Lee BB, Do YS, Byun HS, Choo IW, Kim DI, Huh SH. Advanced management of

- 508           venous malformation with ethanol sclerotherapy: mid-term results. *J Vasc Surg.*  
509           2003;37: 533-538. doi: 10.1067/mva.2003.91.
- 510       7. Kaji N, Kurita M, Ozaki M, Takushima A, Harii K, Narushima M, et al.  
511           Experience of sclerotherapy and embolosclerotherapy using ethanolamine oleate  
512           for vascular malformations of the head and neck. *Scand J Plast Reconstr Surg*  
513           *Hand Surg.* 2009;43: 126-136. doi: 10.1080/02844310902840296.
- 514       8. Górriz E, Carreira JM, Reyes R, Gervás C, Pulido JM, Pardo MD, et al.  
515           Intramuscular low flow vascular malformations: treatment by means of direct  
516           percutaneous embolization. *Eur J Radiol.* 1998;27: 161-165. doi:  
517           10.1016/s0720-048x(97)00045-4.
- 518       9. Mimura H, Akita S, Fujino A, Jinnin M, Ozaki M, Osuga K, et al. Japanese  
519           clinical practice guidelines for vascular anomalies 2017. *J Dermatol.* 2020;47:  
520           e138-e183. doi: 10.1111/1346-8138.15189.
- 521       10. Mulliken JB, Burrows PE, Fishman SJ. Mulliken and Young's vascular  
522           anomalies: hemangiomas and malformations. 2nd ed. New York: Oxford  
523           University Press; 2013. pp. 662-672. doi:  
524           10.1093/med/9780195145052.001.0001.
- 525       11. Heit JJ, Do HM, Prestigiacomo CJ, Delgado-Almandoz JA, English J, Gandhi

- 526 CD, et al. Guidelines and parameters for percutaneous sclerotherapy for the  
527 treatment of head and neck venous and lymphatic malformations.  
528 *NeuroIntervent Surg.* 2017;9: 611-617. doi: 10.1136/neurintsurg-2015-012255.
- 529 12. Rabe E, Breu FX, Cavezzi A, Smith PC, Frullini A, Gillet JL, et al. European  
530 guidelines for sclerotherapy in chronic venous disorders. *Phlebology.* 2014;29:  
531 338-354. doi: 10.1177/0268355513483280.
- 532 13. Uehara S, Osuga K, Yoneda A, Oue T, Yamanaka H, Fukuzawa M. Intralesional  
533 sclerotherapy for subcutaneous venous malformations in children. *Pediatr Surg*  
534 *Int.* 2009;25: 709-713. doi: 10.1007/s00383-009-2414-y.
- 535 14. Ozaki M, Kurita M, Kaji N, Fujino T, Narushima M, Takushima A, et al. Efficacy  
536 and evaluation of safety of sclerosants for intramuscular venous malformations:  
537 clinical and experimental studies. *Scand J Plast Reconstr Surg Hand Surg.*  
538 2010;44: 75-87. doi: 10.3109/02844310903569725.
- 539 15. Mimura H, Kanazawa S, Yasui K, Fujiwara H, Hyodo T, Mukai T, et al.  
540 Percutaneous sclerotherapy for venous malformations using polidocanol under  
541 fluoroscopy. *Acta Med Okayama.* 2003;57: 227-234. doi: 10.18926/AMO/51909.
- 542 16. Nakahata K, Uehara S, Zenitani M, Nakamura M, Osuga K, Okuyama H. Patient  
543 satisfaction after sclerotherapy of venous malformations in children. *Pediatr Int.*

- 544 2016;58: 721-725. doi: 10.1111/ped.12880.
- 545 17. Yamaki T, Nozaki M, Sasaki K. Color duplex-guided sclerotherapy for the  
546 treatment of venous malformations. *Dermatol Surg.* 2000;26: 323-328. doi:  
547 10.1046/j.1524-4725.2000.99248.x.
- 548 18. Jo JY, Chin JH, Park PH, Ku SW. Cardiovascular collapse due to right heart  
549 failure following ethanol sclerotherapy: A case report. *Korean J Anesthesiol.*  
550 2014;66: 388-391. doi: 10.4097/kjae.2014.66.5.388.
- 551 19. Marrocco-Trischitta MM, Guerrini P, Abeni D, Stillo F. Reversible cardiac arrest  
552 after polidocanol sclerotherapy of peripheral venous malformation. *Dermatol*  
553 *Surg.* 2002;28: 153-155. doi: 10.1046/j.1524-4725.2002.00344.x.
- 554 20. Horbach SER, Lokhorst MM, Saeed P, de Gouyon Matignon de Pontouraude  
555 CMF, Rothová A, van der Horst CMAM. Sclerotherapy for low-flow vascular  
556 malformations of the head and neck: A systematic review of sclerosing agents. *J*  
557 *Plast Reconstr Aesthet Surg.* 2016;69: 295-304. doi: 10.1016/j.bjps.2015.10.045.
- 558 21. Hoque S, Das BK. Treatment of venous malformations with ethanolamine  
559 oleate: a descriptive study of 83 cases. *Pediatr Surg Int.* 2011;27: 527-531. doi:  
560 10.1007/s00383-010-2824-x.
- 561 22. Kobayakawa M, Kokubu S, Hirota S, Koizumi J, Nishida N, Yasumoto T, et al.

- 562 Short-term safety and efficacy of balloon-occluded retrograde transvenous  
563 obliteration using ethanolamine oleate: Results of a prospective, multicenter,  
564 single-arm trial. *J Vasc Interv Radiol.* 2017;28: 1108-1115.e2. doi:  
565 10.1016/j.jvir.2017.03.041.
- 566 23. Masaki M, Obara K, Suzuki S, Orikasa K, Mitsuhashi H, Iwasaki K, et al. The  
567 destructive effects of sclerosant ethanolamine oleate on mammalian vessel  
568 endothelium. *Gastroenterol Jpn.* 1990;25: 230-235. doi: 10.1007/BF02776821.
- 569 24. Bagga B, Goyal A, Das A, Bhalla AS, Kandasamy D, Singhal M, et al.  
570 Clinicoradiologic predictors of sclerotherapy response in low-flow vascular  
571 malformations. *J Vasc Surg Venous Lymphat Disord.* 2021;9: 209-219.e2. doi:  
572 10.1016/j.jvsv.2020.03.011.
- 573 25. Alexander MD, McTaggart RA, Choudhri OA, Marcellus ML, Do HM.  
574 Percutaneous sclerotherapy with ethanolamine oleate for venous malformations  
575 of the head and neck. *J Neurointerv Surg.* 2014;6: 695-698. doi:  
576 10.1136/neurintsurg-2013-010924.
- 577 26. Rautio R, Saarinen J, Laranne J, Saleniui JP, Keski-Nisula L. Endovascular  
578 treatment of venous malformations in extremities: Results of sclerotherapy and  
579 the quality of life after treatment. *Acta Radiol.* 2004;45: 397-403. doi:



- 580           10.1080/02841850410004913.
- 581           27. Wong DL, Baker CM. Pain in children: Comparison of assessment scales.  
582           Pediatr Nurs. 1988;14: 9-17.
- 583           28. Hahn GJ, Meecker WQ. Statistical intervals: A guide for practitioners. New York:  
584           John Wiley & Sons; 1991.
- 585           29. Das BK, Hoque S. Treatment of venous malformations with ethanolamine oleate.  
586           Asian J Surg. 2008;31: 220-224. doi: 10.1016/S1015-9584(08)60091-3.
- 587           30. Ribeiro MC, de Mattos Camargo Grossmann S, do Amaral MBF, de Castro WH,  
588           Navarro TP, Procopio RJ, et al. Effectiveness and safety of foam sclerotherapy  
589           with 5% ethanolamine oleate in the treatment of low-flow venous malformations  
590           in the head and neck region: A case series. Int J Oral Maxillofac Surg. 2018;47:  
591           900-907. doi: 10.1016/j.ijom.2017.12.004.
- 592           31. Mimura H, Fujiwara H, Hiraki T, Gobara H, Mukai T, Hyodo T, et al. Polidocanol  
593           sclerotherapy for painful venous malformations: evaluation of safety and efficacy  
594           in pain relief. Eur Radiol. 2009;19: 2474-2480. doi: 10.1007/s00330-009-1442-2.
- 595           32. Nagata S, Tanaka N, Kuhara A, Kugiyama T, Tanoue S, Koganemaru M, et al.  
596           Value of fat-suppressed T2-weighted imaging for predicting short-term pain relief  
597           after sclerotherapy for venous malformations in the extremities. Jpn J Radiol.

- 598           2023;41: 1157-1163. doi: 10.1007/s11604-023-01442-x. Epub 2023 May 12.
- 599           33. Fujiki M, Ozaki M, Kurachi I, Iwashina Y, Takushima A. Risk factors for  
600           macroscopic haemoglobinuria after sclerotherapy using ethanalamine oleate for  
601           venous malformations. *Eur J Vasc Endovasc Surg.* 2019;58: 105-111. doi:  
602           10.1016/j.ejvs.2018.12.018.
- 603           34. Yamaki T, Nozaki M, Sakurai H, Takeuchi M, Soejima K, Kono T. Prospective  
604           randomized efficacy of ultrasound-guided foam sclerotherapy compared with  
605           ultrasound-guided liquid sclerotherapy in the treatment of symptomatic venous  
606           malformations. *J Vasc Surg.* 2008;47: 578-584. doi: 10.1016/j.jvs.2007.11.026.
- 607           35. Hashizume M, Kitano S, Yamaga H, Sugimachi K. Haptoglobin to protect against  
608           renal damage from ethanalamine oleate sclerosant. *Lancet.* 1988;2: 340-341. doi:  
609           10.1016/s0140-6736(88)92400-2.
- 610           36. Costa JR, Torriani MA, Hosni ES, D'Avila OP, de Figueiredo PJ. Sclerotherapy  
611           for vascular malformations in the oral and maxillofacial region: treatment and  
612           follow-up of 66 lesions. *J Oral Maxillofac Surg.* 2011;69: e88-e92. doi:  
613           10.1016/j.joms.2010.06.204.
- 614

**Obtain consent**

45 patients

**Eligibility assessment**

e.g., venous malformations deemed difficult-to-resect, one or more target venous malformations with a major axis of  $\geq 30$  mm in extremities and  $\geq 20$  mm in the head and neck region on MRI or CT

Excluded one patient who was deemed ineligible by the investigator

**Enrollment**

Target number: 44 patients (Cystic type: 22, Diffuse type: 22)

Enrolment period: 2 years from January 2021

Follow-up period: 3 months

**Intervention**

44 patients (Cystic type: 22, Diffuse type: 22)

Single administration of ethanolamine oleate

**Efficacy assessment**

44 patients (Cystic type: 22, Diffuse type: 22)

Primary endpoint:  $\geq 20\%$  reduction in the venous malformation volume from the time of enrolment to 3 months post-treatment

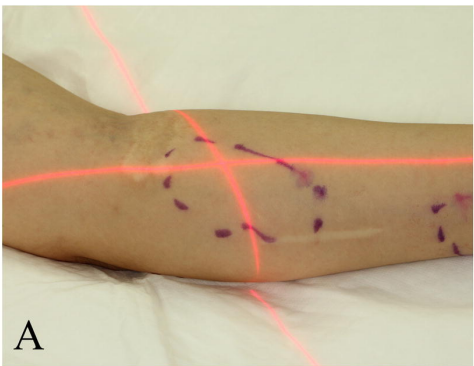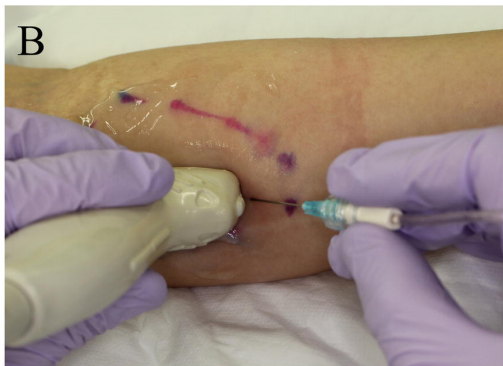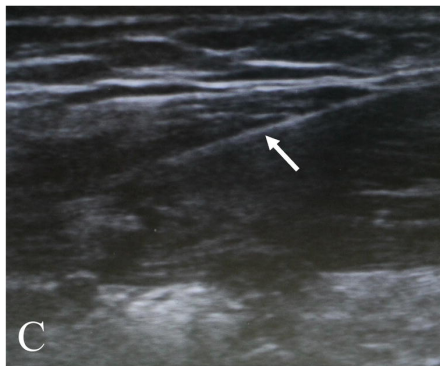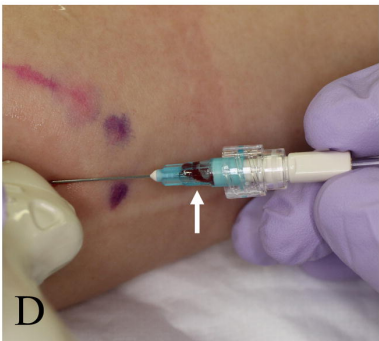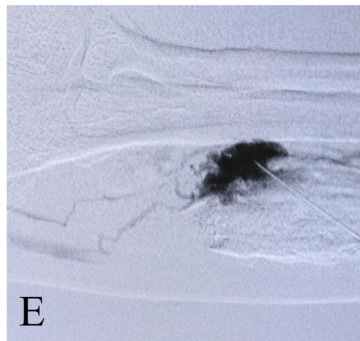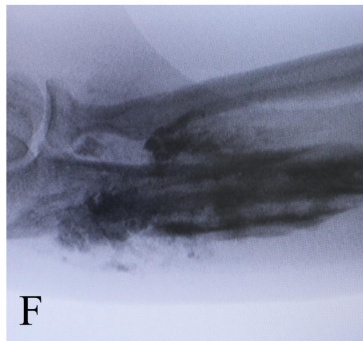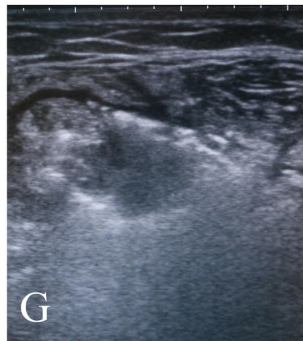

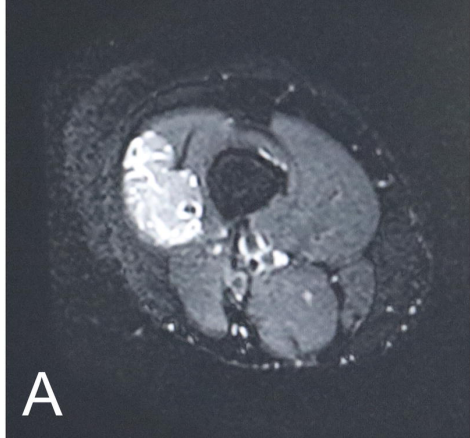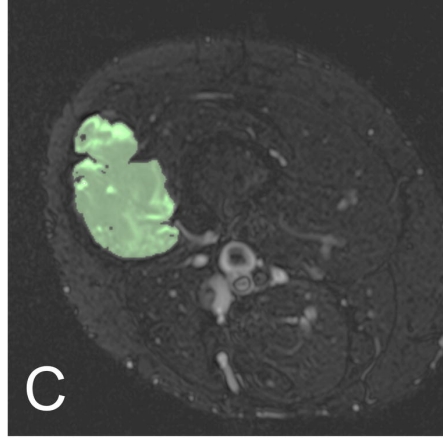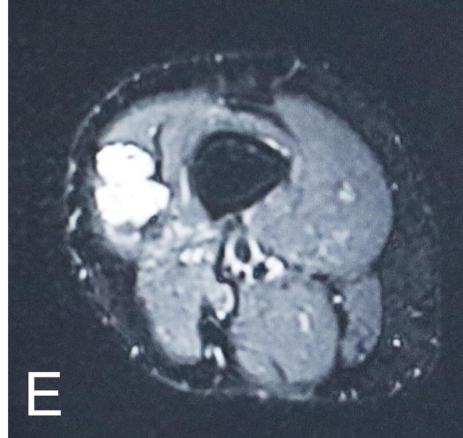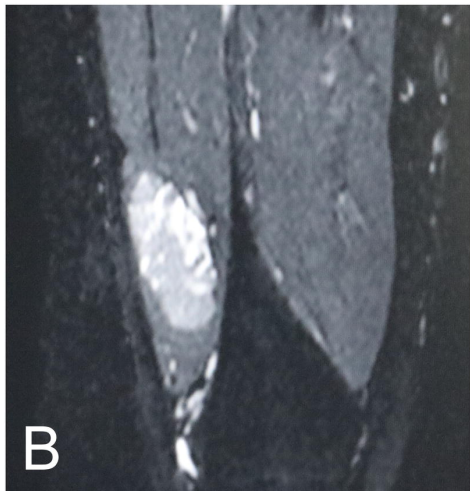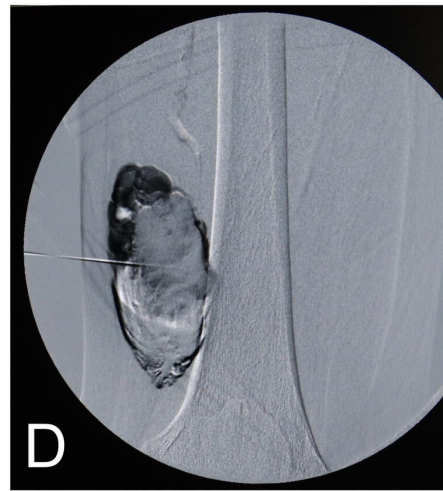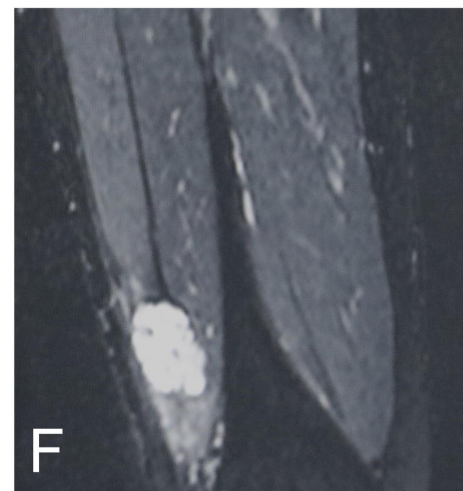

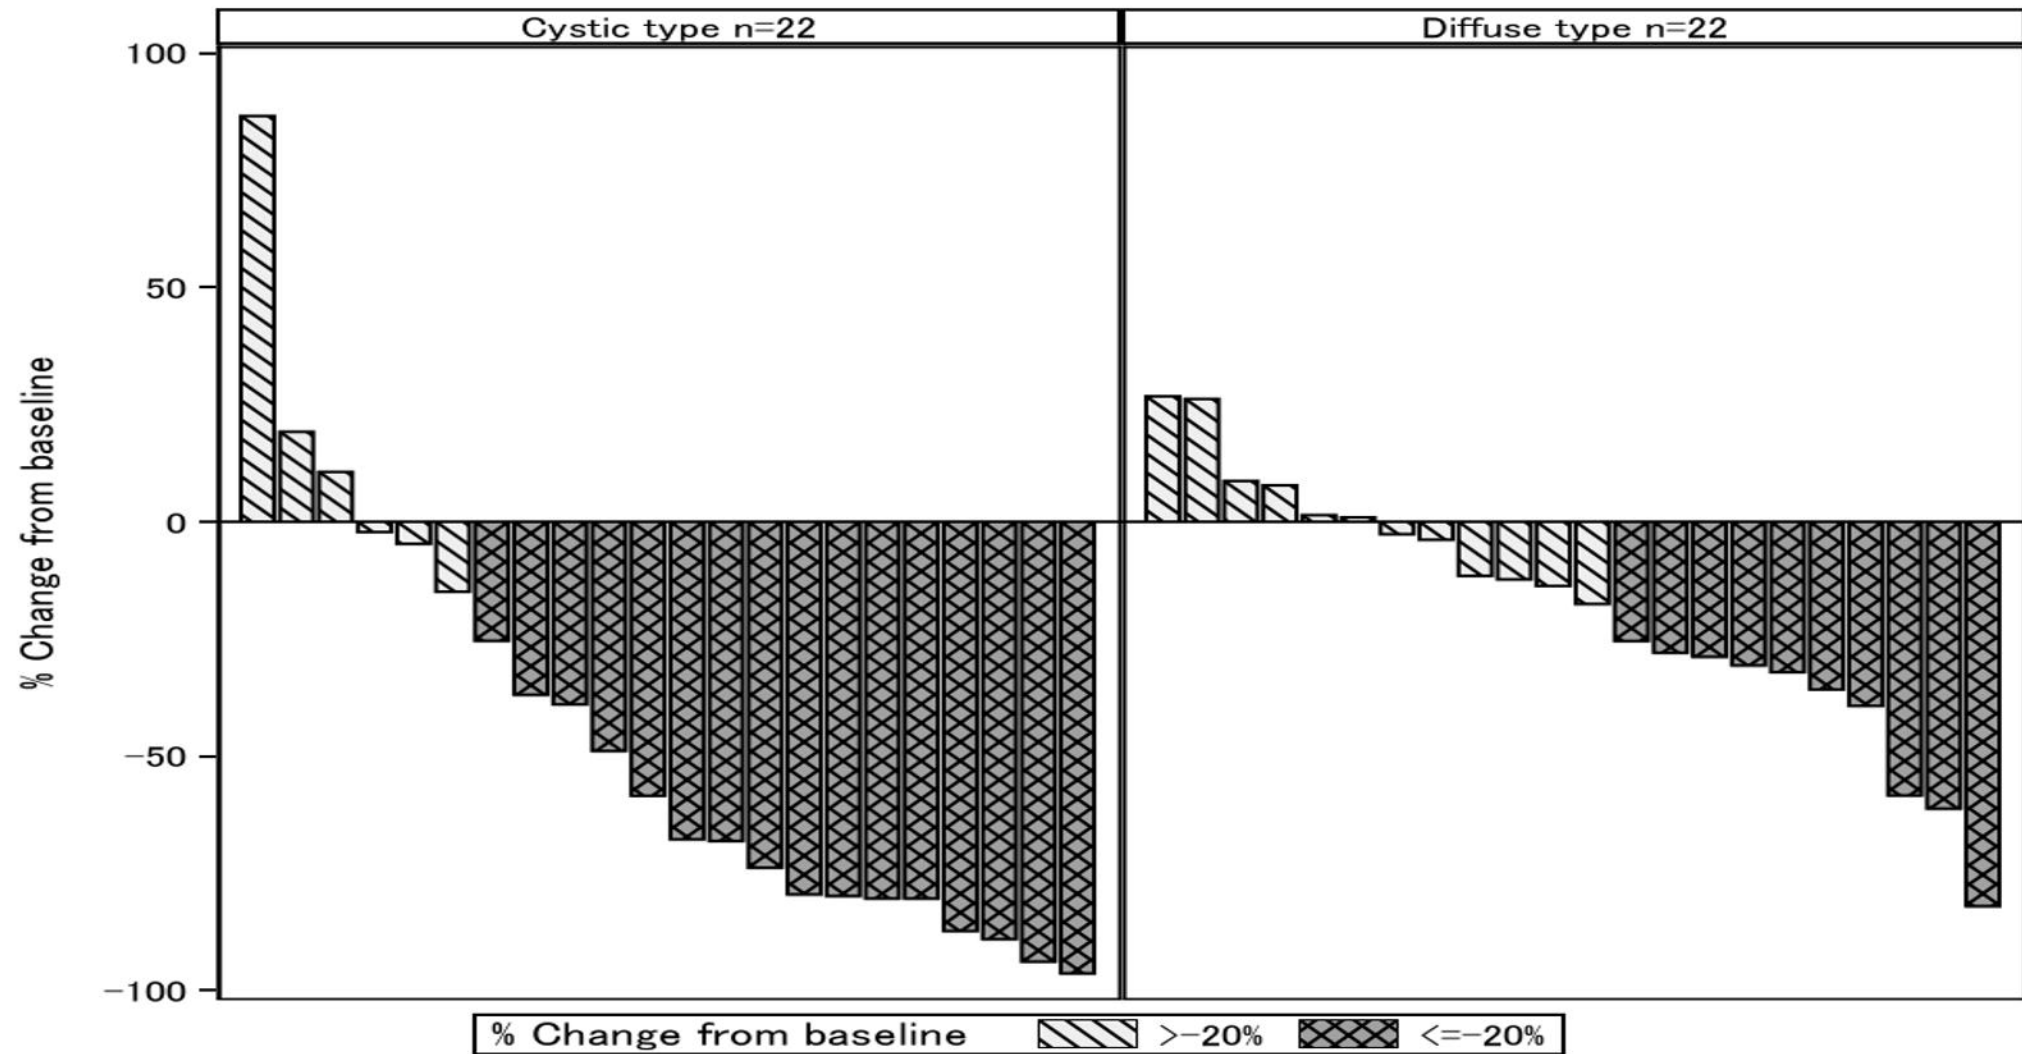

All n=44

% Change from baseline

100  
50  
0  
-20  
-50  
-100

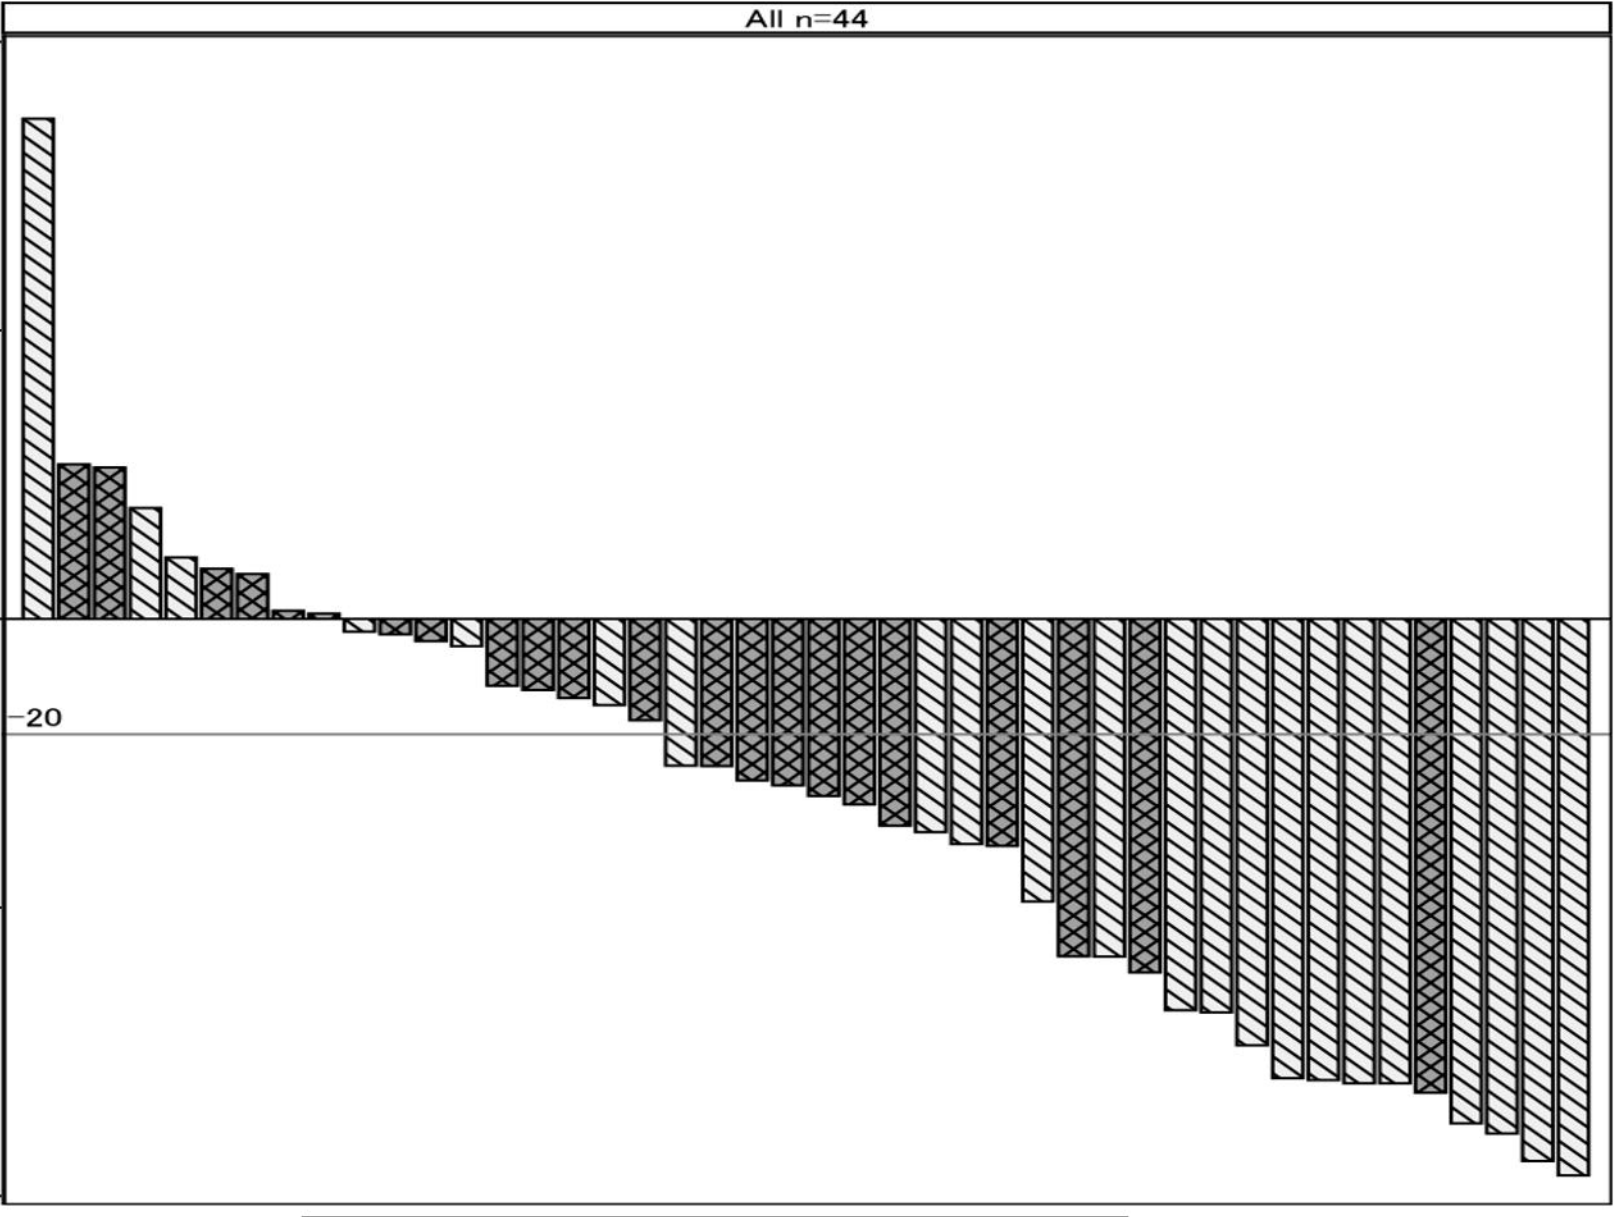

Lesion    Cystic type    Diffuse type
